# Supplementary material
Source: PubMed Central journal article supplement (PMC7051859)
Supplement: NIHMS1553134-supplement-Supplement1.pdf [file NIHMS1553134-supplement-Supplement1.pdf]

## Supplementary Appendix

This appendix has been provided by the authors to give readers additional information about their work.

Supplement to: Gupta A, Montepiedra G, Aaron L, et al. Isoniazid preventive therapy in HIV-infected pregnant and postpartum women. *N Engl J Med* 2019;381:1333-46. DOI: 10.1056/NEJMoa1813060

## Supplementary Appendix

### Table of contents

|                                                                                                                                                                                                                                                |      |
|------------------------------------------------------------------------------------------------------------------------------------------------------------------------------------------------------------------------------------------------|------|
| 1. <b>Supplementary Information on Methods.</b> Justification for Noninferiority Margin, Attribution of Relatedness, Definition of Weight Loss, Handling of Censoring.....                                                                     | p 2  |
| 2. <b>Figure S1.</b> Time to Last Clinic Visit by Treatment Arm (Weeks from Randomization), Within Gestational Age Strata.....                                                                                                                 | p 3  |
| 3. <b>Figure S2a.</b> Kaplan-Meier Plots of Time to Primary Safety Endpoint and Time to Secondary Maternal Safety Endpoint (Any Grade 3 or Higher Adverse Event) by Treatment Arm (Weeks from Randomization) and Gestational Age Stratum ..... | p 4  |
| 4. <b>Figure S2b.</b> Kaplan-Meier Plots of Time to Composite Maternal/Infant Efficacy Endpoint by Treatment Arm (Weeks from Randomization) and Gestational Age Stratum.....                                                                   | p 5  |
| 5. <b>Figure S3.</b> Post-hoc Analysis of Adverse Pregnancy Outcomes by Treatment Arm and Gestational Age Stratum.....                                                                                                                         | p 6  |
| 6. <b>Table S1.</b> Analysis of Primary Safety Outcome <sup>1</sup> by Gestational Age and Per-Protocol.....                                                                                                                                   | p 7  |
| 7. <b>Table S2a.</b> Reasons for Study Treatment Discontinuation Among Participants Who Permanently Discontinued Treatment Due to Toxicity.....                                                                                                | p 8  |
| 8. <b>Table S2b.</b> Maternal Off-Study Reasons.....                                                                                                                                                                                           | p 9  |
| 9. <b>Table S3.</b> Estimated Incidence Proportions <sup>1</sup> of Primary Safety Outcome and Key Secondary Maternal, Pregnancy, and Infant Outcomes by 48 Weeks Postpartum.....                                                              | p 10 |
| 10. <b>Table S4.</b> Post-Hoc Sensitivity Analyses of Primary Outcome.....                                                                                                                                                                     | p 12 |
| 11. <b>Table S5.</b> Maternal Deaths.....                                                                                                                                                                                                      | p 13 |
| 12. <b>Table S6.</b> Maternal Active Tuberculosis Cases.....                                                                                                                                                                                   | p 16 |
| 13. <b>Table S7.</b> Grade 3 and 4 Liver Enzyme Abnormalities and Deaths Due to Liver Failure in Recent International Trials of Isoniazid Preventive Therapy (IPT) .....                                                                       | p 17 |
| 14. <b>List of DSMB members.</b> .....                                                                                                                                                                                                         | p 20 |
| 15. <b>Additional Acknowledgements:</b> List of Study Staff Who Contributed to Study Implementation.....                                                                                                                                       | p 22 |
| 16. <b>References.</b> .....                                                                                                                                                                                                                   | p 24 |

## **Supplementary Information on Methods: Justification for Noninferiority Margin, Attribution of Relatedness, Definition of Weight Loss, Handling of Censoring**

### Justification for Noninferiority Margin

The noninferiority margin was determined in consideration of the trade-off that would allow a higher safety outcome rate given the perceived benefit of a much better adherence to the regimen (and thereby assuring effectiveness) when IPT is initiated at pregnancy, specifically in programmatic settings. In the absence of any available statistical framework to guide quantification of the trade-off, clinician judgment was used with feedback from experts and external reviewers during study design.

### Attribution of Relatedness for Primary Outcome

The main guidance for the attribution was that a decision of “at least possibly related” can be made if there is no alternative etiology that could explain the adverse event. Since the study is randomized and the endpoint review is blinded, any inflation of attribution to IPT (i.e. attribution of adverse event to placebo or to active INH when INH is not the true case) was ensured to be balanced and unbiased between the two arms.

### Definition of Weight Loss and Adjudication for Primary Outcome

Unintentional weight loss is considered to be severe if there is 10% to 19% loss in body weight from baseline, and potentially life-threatening if there is at least 20% loss in body weight from baseline or aggressive intervention is indicated<sup>22</sup>; given that the criterion does not differentiate from weight loss that would be expected in postpartum period, the Independent Endpoint Review Committee was entrusted to consider this during adjudication of the primary safety outcome.

### Handling of Censoring in Statistical Analyses

Participants who withdrew consent to complete the study or prematurely discontinued the study (except due to death) were censored at off study date and considered successes. A post-hoc sensitivity analysis that counted those lost to follow-up as failures was performed.

**Figure S1. Time to Last Clinic Visit by Treatment Arm (Weeks from Randomization), Within Gestational Age Stratum**

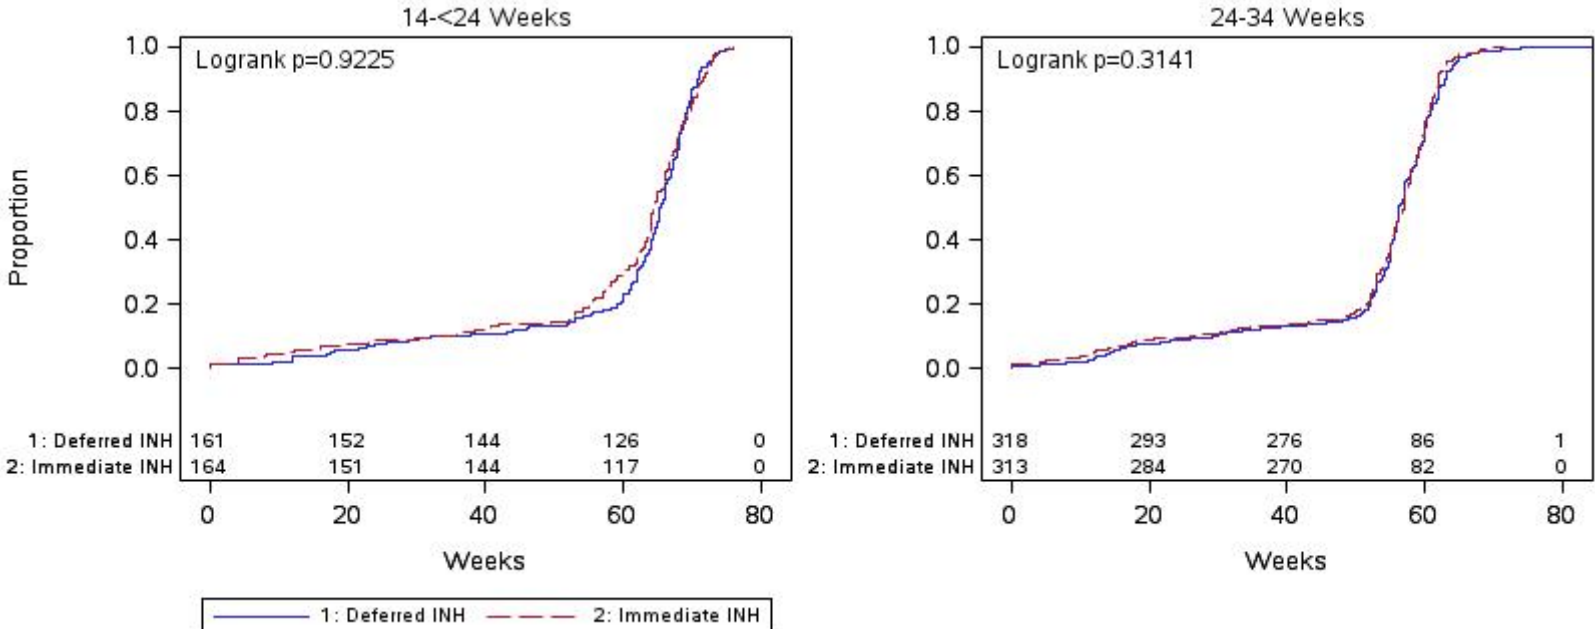

**Figure S2a. Kaplan-Meier Plots of Time to Primary Safety Endpoint and Time to Secondary Maternal Safety Endpoint (Any Grade 3 or Higher Adverse Event) by Treatment Arm (Weeks from Randomization) and Gestational Age Stratum**

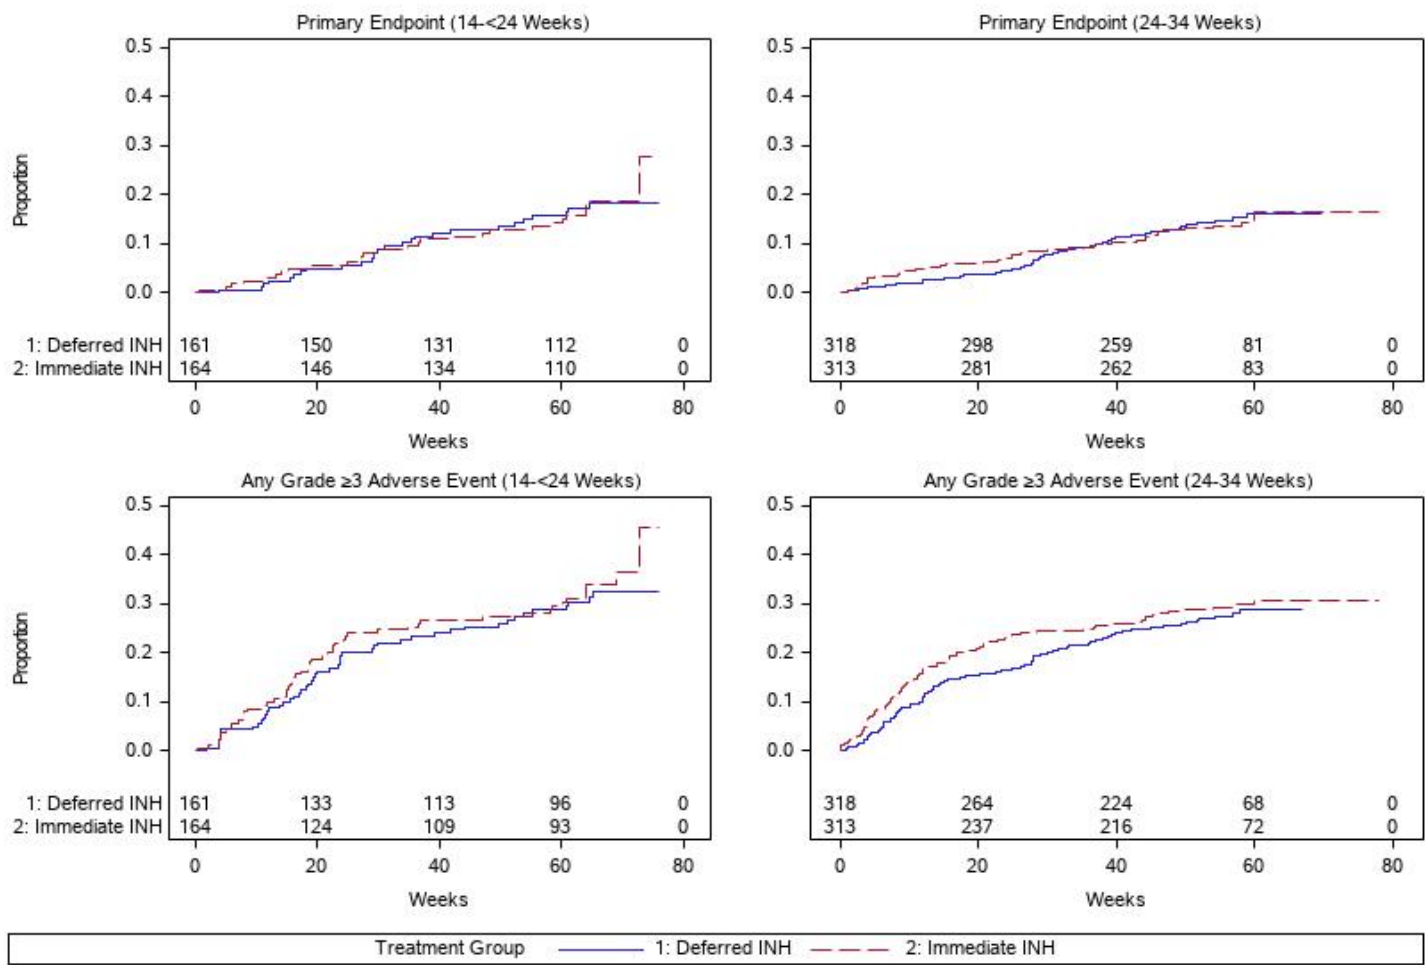

**Figure S2b: Kaplan-Meier Plots of Time to Composite Maternal/Infant Efficacy Endpoint by Treatment Arm (Weeks from Randomization) and Gestational Age Stratum**

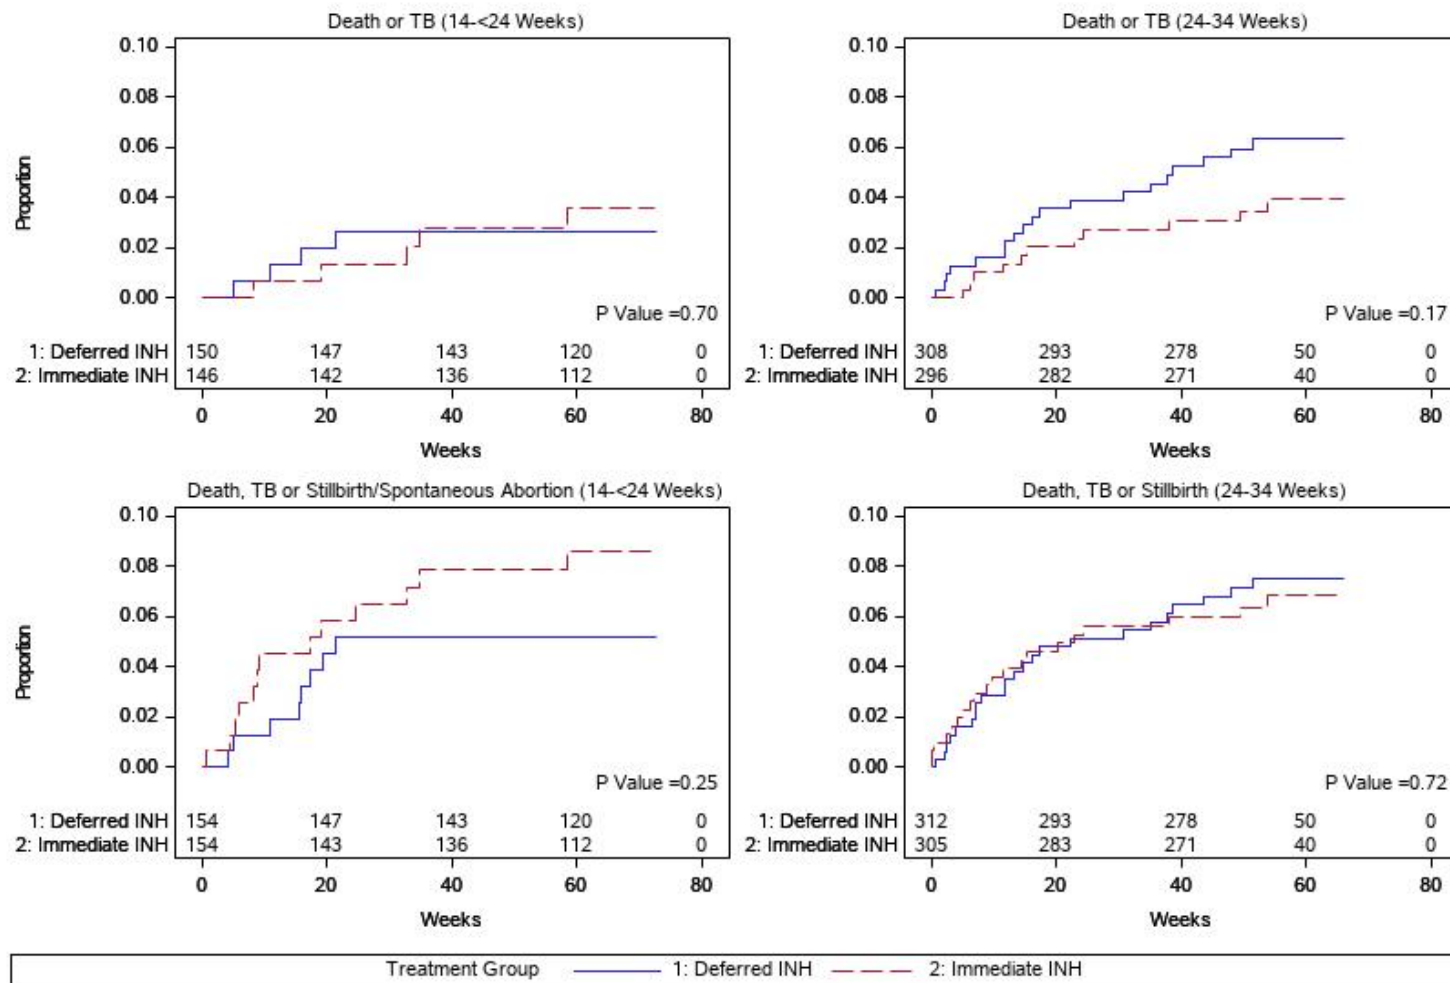

**Figure S3. Post-Hoc Analysis of Adverse Pregnancy Outcomes by Treatment Arm and Gestational Age Stratum**

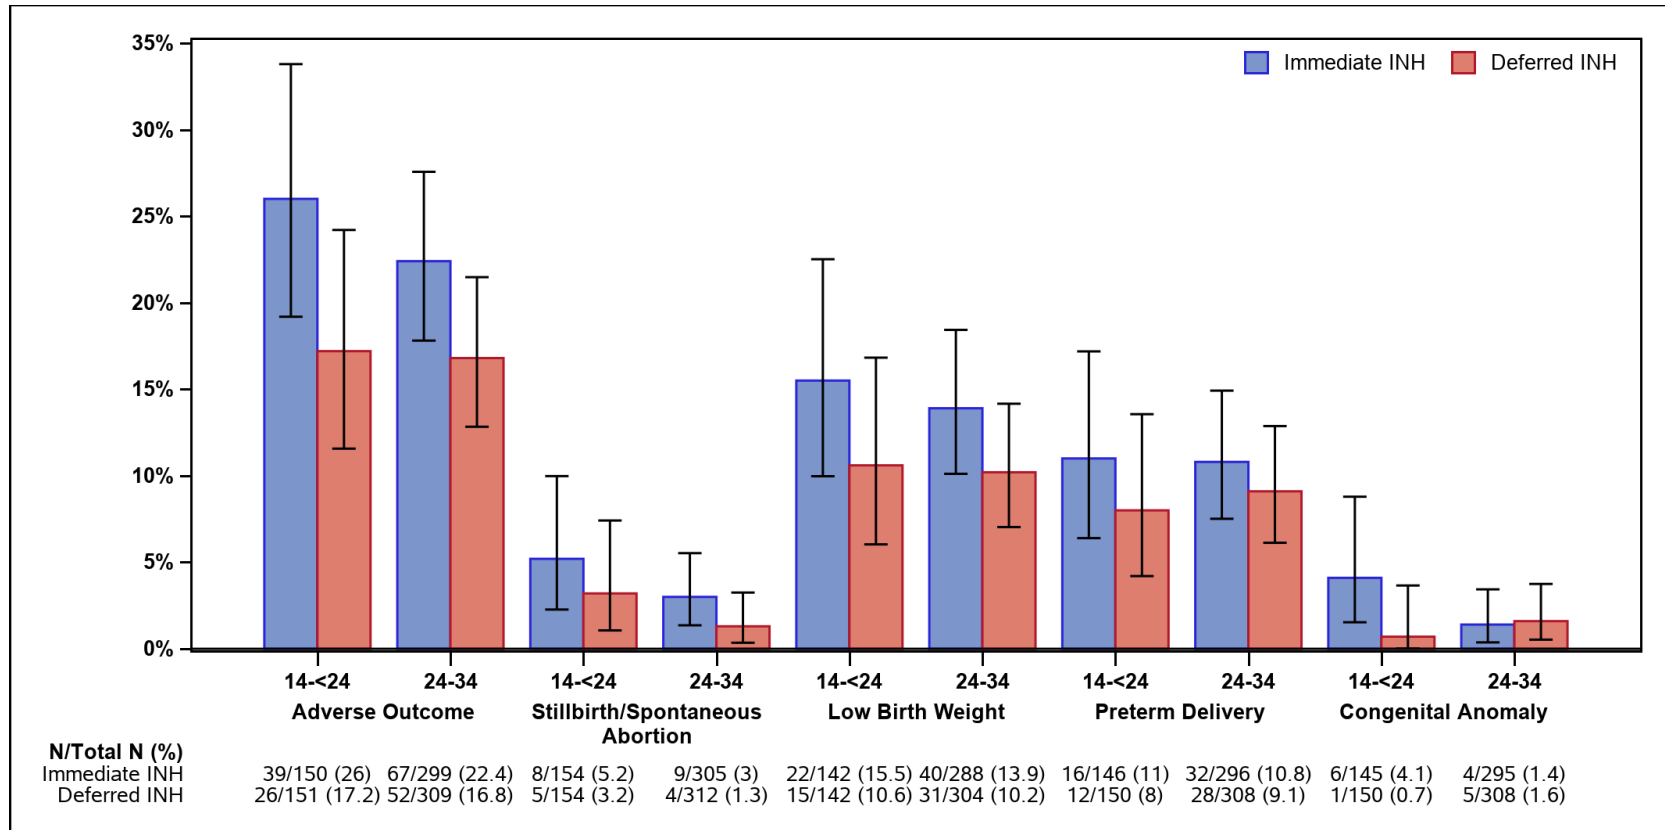

This stratified gestational age analysis was post-hoc and not adjusted for multiple comparisons. Adverse pregnancy outcome was a composite of low birth weight (<2500 g), preterm delivery (<37 weeks of gestation according to the Ballard examination, when available, or obstetrical estimate), spontaneous abortion (<20 weeks of gestation), stillbirth (≥20 weeks of gestation), or major congenital anomaly (according to the Metropolitan Atlanta Congenital Defects Program of the US Centers for Disease Control and Prevention)<sup>1</sup>.

**Table S1. Analysis of Primary Safety Outcome<sup>1</sup> by Gestational Age and Per-Protocol**

|                                      | Immediate INH          |                  | Deferred INH           |                  | IRD (95% CI)        |
|--------------------------------------|------------------------|------------------|------------------------|------------------|---------------------|
|                                      | <i>n / Total n (%)</i> | <i>IR/100 PY</i> | <i>n / Total n (%)</i> | <i>IR/100 PY</i> |                     |
| <b>Intention-to-treat population</b> |                        |                  |                        |                  |                     |
| Primary safety outcome <sup>2</sup>  |                        |                  |                        |                  |                     |
| 14-<24 weeks GA                      | 28/164 (17.1)          | 15.88            | 27/161 (16.8)          | 15.25            | 0.63 (-7.60, 8.86)  |
| 24-34 weeks GA                       | 44/313 (14.1)          | 14.53            | 46/318 (14.5)          | 14.74            | -0.20 (-6.25, 5.84) |
| Overall (weighted)                   | 72/477 (15.1)          | 15.03            | 73/479 (15.2)          | 14.93            | 0.10 (-4.77, 4.98)  |
| <b>Per-protocol population</b>       |                        |                  |                        |                  |                     |
| Primary safety outcome <sup>2</sup>  |                        |                  |                        |                  |                     |
| 14-<24 weeks GA                      | 24/128 (18.8)          | 16.21            | 25/128 (19.5)          | 16.88            | -0.66 (-9.93, 8.60) |
| 24-34 weeks GA                       | 40/248 (16.1)          | 15.86            | 44/260 (16.9)          | 16.64            | -0.78 (-7.73, 6.18) |
| Overall (weighted)                   | 64/376 (17.0)          | 16.00            | 69/388 (17.8)          | 16.71            | -0.71 (-6.27, 4.85) |

<sup>1</sup> Noninferiority of immediate vs. deferred INH is concluded when the upper confidence limit of the 95% CI for the incidence rate (IR) difference (IRD) is less than the noninferiority margin of 5 per 100 person-years.

<sup>2</sup> The primary safety outcome is defined as the earlier of the two events: (1) Grade 3 or higher adverse event attributed to study treatment by an independent endpoint review committee, or (2) permanent discontinuation of study treatment due to toxicity.



**Table S2a. Reasons for Study Treatment Discontinuation among Participants Who Permanently Discontinued Treatment Due to Toxicity**

|                                 | <b>Immediate INH</b> | <b>Deferred INH</b> | <b>Overall</b> |
|---------------------------------|----------------------|---------------------|----------------|
|                                 | <i>n (%)</i>         | <i>n (%)</i>        | <i>n (%)</i>   |
| Dizziness                       | 1 (6%)               | 0 (0%)              | 1 (2%)         |
| Eclampsia                       | 0 (0%)               | 1 (4%)              | 1 (2%)         |
| Fatigue                         | 0 (0%)               | 1 (4%)              | 1 (2%)         |
| Hepatotoxicity, asymptomatic    | 13 (81%)             | 16 (57%)            | 29 (66%)       |
| Hepatotoxicity, symptomatic     | 1 (6%)               | 9 (32%)             | 10 (23%)       |
| Peripheral neuropathy           | 1 (6%)               | 0 (0%)              | 1 (2%)         |
| Weakness                        | 0 (0%)               | 1 (4%)              | 1 (2%)         |
| <b>Total by treatment group</b> | <b>16</b>            | <b>28</b>           | <b>44</b>      |

**Table S2b. Maternal Off-Study Reasons**

|                                             | <b>Immediate INH</b> | <b>Deferred INH</b> | <b>Overall</b> |
|---------------------------------------------|----------------------|---------------------|----------------|
|                                             | <i>n (%)</i>         | <i>n (%)</i>        | <i>n (%)</i>   |
| Completed protocol                          | 389 (82%)            | 396 (83%)           | 785 (82%)      |
| Eligibility failure <sup>1</sup>            | 0 (0%)               | 1 (0%)              | 1 (0%)         |
| Death                                       | 2 (0%)               | 4 (1%)              | 6 (1%)         |
| Not able to get to clinic                   | 21 (4%)              | 15 (3%)             | 36 (4%)        |
| Withdrew consent prior to study completion  | 44 (9%)              | 34 (7%)             | 78 (8%)        |
| Not willing to adhere to study requirements | 2 (0%)               | 9 (2%)              | 11 (1%)        |
| Site unable to contact participant          | 18 (4%)              | 20 (4%)             | 38 (4%)        |
| Co-enrolled in another study                | 1 (0%)               | 0 (1%)              | 1 (0%)         |
| <b>Total by treatment group</b>             | <b>477</b>           | <b>479</b>          | <b>956</b>     |

<sup>1</sup>Diagnosed with confirmed MTB after enrollment

**Table S3: Estimated Incidence Proportions<sup>1</sup> of Primary Safety Outcome and Key Secondary Maternal, Pregnancy, and Infant Outcomes by 48 Weeks Postpartum**

| <b>Outcome</b>                                                      | <b>Immediate INH</b>   | <b>Deferred INH</b>    |                        |
|---------------------------------------------------------------------|------------------------|------------------------|------------------------|
|                                                                     | <i>n / Total n (%)</i> | <i>n / Total n (%)</i> | <i>% Diff (95% CI)</i> |
| <b>Primary outcome<sup>2</sup></b>                                  |                        |                        |                        |
| Intention-to-treat population                                       | 72/477 (15.1)          | 73/479 (15.2)          | -0.2 (-4.7, 4.4)       |
| Per-protocol population                                             | 64/376 (17.0)          | 69/388 (17.8)          | -0.8 (-6.2, 4.6)       |
| <b>Secondary maternal outcomes</b>                                  |                        |                        |                        |
| Any grade 3 or 4 adverse event                                      | 144/477 (30.2)         | 136/479 (28.4)         | 1.8 (-4.0, 7.6)        |
| Hepatotoxicity <sup>3</sup>                                         | 29/477 (6.1)           | 34/479 (7.1)           | -1.0 (-4.2, 2.1)       |
| Peripheral neuropathy                                               | 1/477 (0.2)            | 0/479 (0.0)            | 0.2 (-0.2, 0.6)        |
| Death                                                               | 2/477 (0.4)            | 4/479 (0.8)            | -0.4 (-1.4, 0.6)       |
| Death due to hepatitis while receiving INH <sup>4</sup>             | 1/477 (0.2)            | 1/479 (0.2)            | 0.0 (-0.6, 0.6)        |
| Permanent discontinuation of trial regimen because of toxic effects | 16/477 (3.4)           | 28/479 (5.8)           | -2.5 (-5.1, 0.2)       |
| Tuberculosis                                                        | 3/477 (0.6)            | 3/478 (0.6)            | 0.0 (-1.0, 1.0)        |
| <b>Secondary pregnancy outcomes</b>                                 |                        |                        |                        |
| Adverse pregnancy outcome <sup>5</sup>                              | 106/449 (23.6)         | 78/460 (17.0)          | 6.7 (0.8, 11.9)        |
| Stillbirth/spontaneous abortion                                     | 17/459 (3.7)           | 9/466 (1.9)            | 1.8 (-0.4, 4.1)        |
| Low birth weight                                                    | 62/430 (14.4)          | 46/446 (10.3)          | 4.1 (-0.3, 8.6)        |
| Preterm delivery                                                    | 48/442 (10.9)          | 40/458 (8.7)           | 2.1 (-1.8, 6.1)        |
| Congenital anomaly                                                  | 10/440 (2.3)           | 6/458 (1.3)            | 1 (-0.9, 3.0)          |
| <b>Secondary infant outcomes</b>                                    |                        |                        |                        |
| Any grade 3 or 4 adverse event                                      | 191/445 (42.9)         | 192/464 (41.4)         | 1.6 (-4.9, 8.0)        |
| HIV infection                                                       | 3/439 (0.7)            | 7/458 (1.5)            | -0.9 (-2.2, 0.5)       |
| Infant death: 0-48 weeks after birth                                | 11/445 (2.5)           | 17/464 (3.7)           | -1.2 (-3.4, 1.0)       |
| Neonatal death: 0-7 days after birth                                | 4/445 (0.9)            | 5/464 (1.1)            | -0.2 (-1.5, 1.1)       |
| Tuberculosis                                                        | 0/445 (0.0)            | 1/464 (0.2)            | 0.0 (-0.8, 0.9)        |

<sup>1</sup>All analyses are intent-to-treat unless otherwise specified

<sup>2</sup>The primary safety outcome is defined as the earlier of the two events: (1) Grade 3 or higher adverse event attributed to study treatment by an independent endpoint review committee, or (2) permanent discontinuation of study treatment due to toxicity.

<sup>3</sup> Hepatotoxicity was defined as Grade 3 or higher liver function tests; total bilirubin  $\geq$  Grade 2 and ALT  $\geq$  Grade 2; or ALT  $\geq$  Grade 2 with symptomatic clinical hepatitis.

<sup>4</sup> Post-hoc analysis

<sup>5</sup> Adverse pregnancy outcome was a composite of low birth weight (<2500 g), preterm delivery (<37 weeks of gestation according to the Ballard examination, when available, or obstetrical estimate), spontaneous abortion (<20 weeks of gestation), stillbirth ( $\geq$ 20 weeks of gestation), or major congenital anomaly (according to the Metropolitan Atlanta Congenital Defects Program of the US Centers for Disease Control and Prevention)<sup>24</sup>.

**Table S4. Post-hoc Sensitivity Analyses of Primary Outcome**

| Analysis                | Immediate INH          |                  | Deferred INH           |                  |                     |
|-------------------------|------------------------|------------------|------------------------|------------------|---------------------|
|                         | <i>n / Total n (%)</i> | <i>IR/100 PY</i> | <i>n / Total n (%)</i> | <i>IR/100 PY</i> | <i>IRD (95% CI)</i> |
| Worst-case <sup>1</sup> | 149/477 (31.2)         | 31.11            | 145/479 (30.3)         | 29.65            | 1.45 (-5.49, 8.4)   |
| Complete-case           | 72/399 (18.0)          | 17.14            | 73/406 (18.0)          | 16.94            | 0.21 (-5.34, 5.75)  |

<sup>1</sup>Participants who discontinued study prematurely were counted as failures

A substantial proportion of participants prematurely discontinued the study. In large part this was due to the patient safety letter that was issued in February 2016 (at the recommendation of the DSMB) about potential risks of IPT and ART after 2 deaths from fulminant liver failure occurred in the study. To address the missing data, our primary analysis censored data of participants at their times of premature study discontinuation. This is generally a reasonable approach to handling missing data for this type of outcome. The primary MAR-like assumption for such an analysis is non-informative independent censoring which is the most realistic in a confirmatory clinical trials setting. Further post-hoc comparison did not show significant between arm differences in incidence of premature study follow-up.

To assess the robustness of the primary analysis results to other assumptions, we performed straightforward post hoc sensitivity analyses that counted those who were discontinued the study prematurely as failures (worst-case analysis) and another sensitivity analysis that included only those in the intent to treat population who completed their planned study follow-up (complete-case analysis). For the worst-case analysis, the estimated primary outcome incidence rate was 31.11 per 100 PY in the immediate INH arm and 29.65 per 100 PY in the deferred INH arm, with an IRD = 1.45 and 95% CI: -5.49 to 8.4. For the complete-case analysis, which is unbiased if the complete cases represent a random sample of the study population (MCAR), the estimated primary outcome incidence rate was 17.14 per 100 PY in the immediate INH arm and 16.94 per 100 PY in the deferred INH arm, with an IRD = 0.21 and 95% CI: -5.34 to 5.75; despite the upper limit of the 95% CI being close to the margin, it is not less than 5 and we cannot conclude non-inferiority of the immediate INH arm with this analysis.

**Table S5. Maternal Deaths**

| Characteristic                                       | Study Arm             |                        |               |               |               |               |
|------------------------------------------------------|-----------------------|------------------------|---------------|---------------|---------------|---------------|
|                                                      | Immediate             | Immediate              | Deferred      | Deferred      | Deferred      | Deferred      |
|                                                      | Participant 1         | Participant 2          | Participant 3 | Participant 4 | Participant 5 | Participant 6 |
| Age (years) at entry                                 | 34                    | 38                     | 27            | 36            | 25            | 33            |
| CD4 count (cells/mm <sup>3</sup> ) at labor/delivery | 459                   | 469                    | 402           | 609           | 431           | 533           |
| CD4 count (cells/mm <sup>3</sup> ) at screening      | 351                   | 426                    | 333           | 591           | 188           | 642           |
| HIV RNA (copies/mL) at entry                         | 312                   | <40                    | <40           | <40           | 159           | <40           |
| BMI at entry                                         | 24.0                  | 20.9                   | 29.0          | 23.0          | 39.6          | 21.1          |
| Hepatitis B status at entry                          | Negative              | Negative               | Negative      | Negative      | Negative      | Negative      |
| Hepatitis C status at entry                          | Negative              | Negative               | Unknown       | Negative      | Negative      | Negative      |
| GA at entry (weeks)                                  | 33                    | 21                     | 31            | 26            | 26            | 30            |
| Postpartum (PP) week at death                        | 12 weeks              | 39 weeks               | 5 weeks       | 18 weeks      | 8 weeks       | 6 weeks       |
| Time on INH                                          | 13 weeks (4 AP, 9 PP) | 27 weeks (19 AP, 8 PP) | Never started | 1 week PP     | Never started | Never started |
| ART regimen initiated                                | TDF/3TC/EFV           | TDF/FTC/EFV            | TDF/3TC/EFV   | TDF/3TC/EFV   | TDF/3TC/EFV   | TDF/3TC/EFV   |

|                           | Started 1 week prior to entry | Started 2.4 years prior to entry | Started 4 months prior to entry | Started 2 months prior to entry | Started 3 weeks before entry | Started 1 month before entry |
|---------------------------|-------------------------------|----------------------------------|---------------------------------|---------------------------------|------------------------------|------------------------------|
| Concomitant medication    | No                            | Cotrimoxazole                    | Cotrimoxazole                   | Cotrimoxazole                   | Cotrimoxazole & Herbal*      | Cotrimoxazole                |
| Active alcohol use*       | No                            | No                               | No                              | No                              | No                           | No                           |
| Death cause               | Fulminant hepatitis           | Bacterial sepsis                 | Fulminant hepatitis             | Fulminant hepatitis             | Hepatitis                    | Pneumonia                    |
| Attribution to study drug | Related                       | Not related                      | Not related                     | Related                         | Not related                  | Not related                  |

AP: antepartum; PP: postpartum; TDF: tenofovir; 3TC: lamivudine; FTC: emtricitabine; EFV: efavirenz; \*based on Expedited Adverse Event report narrative

#### Brief narratives of the 4 liver-related deaths based on AE reports

Of the four women who died from liver-related causes, two never received active INH. The first woman who never received INH was a 27 year old woman. She entered the study at 31 weeks gestation with a BMI of 29, a CD4 of 333 and an HIV RNA of <40 copies/ml and she had been on ART TDF/3TC/EFV along with cotrimoxazole for 4 months prior to study entry. She was randomized to the deferred INH arm. At entry, she had a Grade 1 ALT and was HBV negative and HCV unknown. Because of the grade 1 ALT, the site repeated the LFTs 2 days after entry and observed a grade 2 ALT, a grade 3 AST and normal bilirubin and she remained asymptomatic. She returned to the clinic 6 days later and reported no symptoms but she now had a grade 4 AST and ALT and had her study drug (placebo) was held and then discontinued permanently after this was confirmed a few days later. Her LFTs normalized. She had a normal vaginal delivery at 37 weeks gestation and remained on her ART. However, at postpartum week 3 she developed jaundice and she was briefly hospitalized a few days later. Her treating clinician switched her efavirenz to lopinavir/ritonavir. She had worsening liver dysfunction and died of fulminant hepatitis. No hepatitis A, herbal or acetaminophen use was reported. This death was not INH-related.

The second woman who never started INH but had a liver-related death was a 25 year old woman. At 26 weeks gestation, she was randomized to the deferred INH arm and started on placebo. At entry, she had a BMI of 39.6, a CD4 of 188, and a HIV RNA of 159 copies/ml. She was HBV and HCV negative and had no alcohol use. She was on efavirenz-based ART along with cotrimoxazole that was started 3 weeks prior to study entry. She had a normal vaginal delivery at 41 weeks; she had a grade 1 ALT at delivery and then 4 days after delivery developed a grade 3 AST without any symptoms. She left the study site to be at her native home for postpartum

care and was not readily contactable. She was traced with extensive site follow-up and 4 weeks after delivery her mother called the study team back and reported participant was having vomiting and yellow eyes. She stopped study drug (blinded placebo) and she had some improvement but then was hospitalized 3 weeks later and had sudden worsening of symptoms and liver enzymes and died. She was reportedly also on an herbal treatment of unknown type or duration and remained on efavirenz and cotrimoxazole until she was hospitalized per outside available records and verbal autopsy. No hepatitis A or acetaminophen use was reported. This death was also not INH-related.

The other two liver-related deaths were deemed to be INH-related.

The first was a 34 year old woman. She was randomized to the immediate INH arm. At study entry, she was 33 weeks pregnant with a BMI of 24. She was HBV and HCV negative, alcohol negative, had normal LFTs, and her CD4 was 351 with a HIV RNA of 312 copies/ml. Her EFV-based ART was started 1 week prior to study entry. At 39 weeks gestation, she had a normal vaginal delivery but was noted to have a grade 4 neutropenia so study drug (INH) was held. Her neutropenia resolved and at 2 weeks postpartum she restarted her INH. One week after resuming she was observed to have a grade 1 ALT, AST and was asymptomatic. Over the subsequent 4 weeks she developed gastritis symptoms but her LFTs remained grade 1 and she was given some antacids. At 4 weeks postpartum, she developed vomiting, decreased appetite and on the same day her study drug (INH) was stopped. Unfortunately, post-cessation of her study drug INH, she developed worsening symptoms of clinical hepatitis and advanced to grade 4 AST and ALT and died in the hospital. No hepatitis A, herbal or acetaminophen use was reported.

The second woman who initiated INH in the study and died was a 36 year old woman. She enrolled at 26 weeks gestation with a BMI of 23. Her CD4 was 591 cells/mm<sup>3</sup> and her HIV RNA was <40 copies/ml on an EFV-based ART regimen along with cotrimoxazole. She was randomized to the deferred INH arm. At week 12 postpartum she started INH and received one week of INH. She was noted to have a grade 2 ALT and was asymptomatic. The study clinician held her study drug (active INH). Over the next 5 weeks monitoring of LFTs continued after study drug discontinuation as per protocol SOE with no missed sessions but, unfortunately, her LFTs continued to worsen and the woman became symptomatic and eventually died. No hepatitis A, herbal or acetaminophen use was reported.



**Table S6. Maternal Active Tuberculosis Cases**

| <b>Participant</b> | <b>Treatment group</b> | <b>Study week of onset</b> | <b>Week of onset relative to delivery</b> | <b>Type of MTB</b>      | <b>DST profile</b> | <b>Age at entry</b> | <b>CD4 at entry</b> | <b>IGRA status at entry</b> | <b>TST status at delivery</b> | <b>IGRA status prior to TB diagnosis</b> | <b>TB exposure</b> |
|--------------------|------------------------|----------------------------|-------------------------------------------|-------------------------|--------------------|---------------------|---------------------|-----------------------------|-------------------------------|------------------------------------------|--------------------|
| 1                  | Immediate INH          | 55                         | 48PP                                      | Confirmed pulmonary MTB | INH-resistant      | 27                  | 254                 | Positive                    | Positive                      | Positive                                 | No                 |
| 2                  | Immediate INH          | 38                         | 28PP                                      | Confirmed pulmonary MTB | INH-sensitive      | 25                  | 289                 | Negative                    | Positive                      | Positive                                 | No                 |
| 3                  | Immediate INH          | 33                         | 10PP                                      | Probable pulmonary MTB  | N/A                | 29                  | 678                 | Positive                    | Positive                      | Positive                                 | No                 |
| 4                  | Deferred INH           | 35                         | 27PP                                      | Probable pulmonary MTB  | N/A                | 40                  | 261                 | Negative                    | Negative                      | Negative                                 | No                 |
| 5                  | Deferred INH           | 51                         | 40PP                                      | Confirmed pulmonary MTB | INH-sensitive      | 31                  | 79                  | Indeterminate               | Negative                      | Indeterminate                            | No                 |
| 6                  | Deferred INH           | 48                         | 36PP                                      | Confirmed pulmonary MTB | INH-sensitive      | 32                  | 504                 | Positive                    | Negative                      | Positive                                 | No                 |

**Table S7. Grade 3 and 4 Liver Enzyme Abnormalities and Deaths Due to Liver Failure in 7 Recent International Trials of Isoniazid (INH) Preventive Therapy (IPT)**

| Author/Journal                                        | Sites                                                                                                | Arms/HIV                                                                                                         | ART+IPT                     | LFT monitoring                      | Grade 3 or 4 LFTs in INH arm                          | Deaths due to hepatic failure in INH arm                                                                                                            |
|-------------------------------------------------------|------------------------------------------------------------------------------------------------------|------------------------------------------------------------------------------------------------------------------|-----------------------------|-------------------------------------|-------------------------------------------------------|-----------------------------------------------------------------------------------------------------------------------------------------------------|
| Swindells et al<br>NEJM 2019<br>BRIEF TB <sup>2</sup> | Multicountry<br>Sub Saharan<br>Africa, South<br>Africa, Asia, Haiti,<br>US                           | 1HP vs. 9 mo of<br>IPT<br><br>HIV+: All enrolled,<br>N=3000                                                      | Yes, 755/1498<br>(50%)      | Baseline and only if<br>symptomatic | 42/1498 (2.8%)                                        | 0 of 1498 (0%)                                                                                                                                      |
| Menzies<br>NEJM 2018 <sup>3</sup>                     | Australia, Benin,<br>Brazil, Canada,<br>Ghana, Guinea,<br>Indonesia, Saudi<br>Arabia, South<br>Korea | 4 mo Rifampin vs.<br>9 mo of IPT<br><br>Total enrolled<br>n=6012<br>HIV+ N=242                                   | Yes, 123 HIV+<br>in IPT arm | Baseline and 1<br>month             | 65/3205 (2%)<br><br>HIV-specific data not<br>reported | 1 death of 3205 (0.03%)<br><br>Death judged possibly related<br>to study by two panel members<br>and unlikely related by one<br><br>Unknown if HIV+ |
| ANRS<br>TEMPRANO<br>NEJM 2015 <sup>4</sup>            | Ivory Coast                                                                                          | 4 arms<br>Early ART, Early<br>ART+IPT; Deferred<br>ART; Deferred<br>ART+IPT<br><br>HIV+, All enrolled,<br>n=2056 | Yes, 2 arms<br>n=1030       | Baseline and every<br>6 months      | 12/1030 (1.1%)                                        | 2 hepatitis deaths reported but<br>unclear which arms and<br>whether drug related                                                                   |

| Author/Journal                                                      | Sites                                      | Arms/HIV                                                                                                                                         | ART+IPT                                                         | LFT monitoring                                           | Grade 3 or 4 LFTs in INH arm                                                                                                       | Deaths due to hepatic failure in INH arm                                                                                                      |
|---------------------------------------------------------------------|--------------------------------------------|--------------------------------------------------------------------------------------------------------------------------------------------------|-----------------------------------------------------------------|----------------------------------------------------------|------------------------------------------------------------------------------------------------------------------------------------|-----------------------------------------------------------------------------------------------------------------------------------------------|
| Rangaka et al<br>Lancet 2014 <sup>5</sup>                           | South Africa                               | ART vs. ART+ 12 months of IPT<br>HIV+, All enrolled, n=1329                                                                                      | Yes, n=662 in 12 months of IPT arm                              | Baseline, monthly x3 months then q3months                | 19/662 (2.9%)                                                                                                                      | 16 deaths in INH arm (0.9/100PY); 2 TB deaths, 6 non TB and nonstudy drug, 8 unknown with 2 occurring during IPT. Relatedness not determined. |
| Sterling et al<br>NEJM 2011, <sup>6</sup><br>AIDS 2016 <sup>7</sup> | US, Brazil, Spain, Peru, Canada, Hing Kong | Weekly isoniazid +rifapentine vs. 9 mo. IPT<br>HIV+ 193 of 7731 enrolled                                                                         | Yes, n=58 of 193 HIV+ on ART in 9 months IPT arm                |                                                          | 2.7% in whole trial in 9H arm, 8/186 (4%) discontinued 9H due to hepatotoxicity in HIV study. LFT monitoring only done at baseline | 1 death due to chronic liver disease or cirrhosis on INH or within 60 days of last dose                                                       |
| Martinson et al<br>NEJM<br>2011 <sup>8</sup>                        | South Africa                               | 4 arms<br>Isoniazid+rifpentine for 12 weeks vs. isoniazid+rifampin for 12 weeks vs. IPT continuous up to 6 years vs. 6 mo IPT<br>HIV+ all n=1148 | 327 in IPT arm<br>None at entry, 18.9% started ART during study | Baseline, 1,2,6 months                                   | 17/327 (5.2%)<br>Grade 3<br>14/327 (4.3%)<br>Grade 4                                                                               | 0/25 deaths due to study drug                                                                                                                 |
| Samandari et al<br>Lancet 2011<br>BOTUSA <sup>9</sup>               | Botswana                                   | 6months of IPT vs. 36 months of IPT<br>HIV+ all n=1995                                                                                           | Yes, n=946/1995 started ART during the study                    | Baseline, before ART started and if clinically indicated | 29 of 1995 (1.45 per 100 PY biochemical hepatitis);<br>8 had clinical hepatitis (0.4/100PY), 2                                     | 1 died of hepatic encephalopathy                                                                                                              |

| Author/Journal | Sites | Arms/HIV | ART+IPT                                                     | LFT monitoring | Grade 3 or 4 LFTs in INH arm       | Deaths due to hepatic failure in INH arm |
|----------------|-------|----------|-------------------------------------------------------------|----------------|------------------------------------|------------------------------------------|
|                |       |          | 6months IPT vs. 36 months of IPT<br>(Total enrolled n=1995) |                | hepatic encephalopathy (0.1/100PY) |                                          |

Abbreviations: ART: Antiretroviral therapy; INH: Isoniazid; IPT Isoniazid Preventive Therapy

**P1078 DSMB Members in Attendance**

**Overall (Participated in at least one P1078 DSMB review)**

Haroon Saloojee (Chair)  
Wafaa El-Sadr  
David Harrington (Chair)  
Jonathan B. Levine  
Carl Jacobus Lombard  
Mary Faith Marshall  
Lucky Mokgatlhe  
Paula Munderi  
Andrew Nunn  
Jerome Amir Singh  
Betty Kwagala  
Carl Jacobus Lombard  
Alwyn Mwinga  
Papa Salif Sow  
Catherine Hill  
Jerrold J. Ellner  
Grace John-Stewart  
Steven Joffe  
Barbara E. Murray  
Merlin L. Robb

**May 18-19, 2010 (Protocol Initiation Review)**

Haroon Saloojee (Chair)  
Wafaa El-Sadr  
David Harrington  
Jonathan B. Levine  
Carl Jacobus Lombard  
Mary Faith Marshall  
Lucky Mokgatlhe  
Paula Munderi  
Andrew Nunn  
Jerome Amir Singh

**April 11-12, 2011 (Administrative update)**

Haroon Saloojee (Chair)  
Wafaa El-Sadr  
David Harrington  
Betty Kwagala  
Jonathan B. Levine  
Carl Jacobus Lombard  
Mary Faith Marshall  
Lucky Mokgatlhe  
Paula Munderi  
Alwyn Mwinga  
Andrew Nunn  
Papa Salif Sow

**March 31-April 2, 2015 (Brief Administrative Update, no follow-up data reported)**

Haroon Saloojee (Chair)  
Jerrold J. Ellner  
David P. Harrington  
Catherine Hill  
Grace John-Stewart  
Steven Joffe  
Barbara E. Murray  
Alwyn Mwinga  
Andrew J. Nunn  
Merlin L. Robb

**September 16-17, 2015 (Interim Safety Review)**

Haroon Saloojee (Chair)  
Jerrold J. Ellner  
David P. Harrington  
Catherine Hill  
Steven Joffe  
Andrew J. Nunn  
Merlin L. Robb  
Barbara Murray

**April 6-8, 2016 (Full Review)**

David P. Harrington (Chair)  
Jerrold J. Ellner  
Catherine Hill  
Steven Joffe  
Grace John-Stewart  
Barbara Murray  
Andrew J. Nunn  
Merlin L. Robb  
Haroon Saloojee (Acting Chair)

**September 26-27, 2016 (Full Review)**

David P. Harrington (Chair)  
Jerrold J. Ellner  
Catherine Hill  
Steven Joffe  
Alwyn Mwinga  
Andrew J. Nunn  
Merlin L. Robb  
Haroon Saloojee

**May 2-3, 2017 (Full Review)**

David P. Harrington (Chair)  
Catherine Hill  
Barbara E. Murray  
Andrew J. Nunn  
Merlin L. Robb  
Haroon Saloojee

## **Additional Acknowledgements: List of Study Team Members Who Contributed to Study Implementation**

### **UGANDA**

#### MU-JHU Research Collaboration

Enid Kabugho, MBChB;  
Deo Wabwire, MBChB, MMed;  
Hellen Kaganzi, MBChB;  
Joel Maena, MBChB;  
Hajira Kataike, MBChB.

### **ZIMBABWE**

#### St. Mary's

Patricia Mandima, MBChB;  
Emmie Marote, SRN MA;  
Mercy Mutambanengwe, BPharm.

#### Seke North

Teacler Nematadzira, MBChB, MCE;  
Suzen Maonera, SRN MS;  
Vongai Chanaiwa, Bpharm, MCE.

#### Harare Family Care

Tapiwa Mbengeranwa, MBChB, MBA;  
Sukunena Maturure, SRN MS;  
Tsungai Mhembere, Bpharm, MPH.

### **SOUTH AFRICA**

#### Soweto

Mandisa Nyati, MD;  
Nasreen Abrahams, MBA;  
Haseena Cassim, MD;  
Ruth Mathiba, MD.

#### Family Clinical Research Unit

Joan Coetzee;  
Jeanne Louw, MSc;  
Marlize Smuts, MPharm;  
Lindie Rossouw, MBChB;  
Magdel Rossouw, MBChB.

#### Desmond Tutu TB Centre

Celeste de Vaal, MD, MpHil;  
Sharon Mbaba, RN;  
Karen du Preez, MD, MSc;  
Frieda Verheye-Dua, PhD.

### **TANZANIA**

#### Kilimanjaro Christian Medical Centre

Aisa Shao, MMed;  
Boniface Njau, MPH;  
Philoteus Sakasaka, MSc;

Seleman Semvua, MPH.

## **BOTSWANA**

### **Gaborone and Molepolole**

Tebogo J. Kakhu, RN/MW, BSN;

Thuto Ralegoreng, MD;

Ayotunde Omoz-oarhe, MD;

Unoda Chakalisa, MD.

## **INDIA**

### **Byramjee Jeejeebhoy Medical College-JHU CRS**

Nishi Suryavanshi, PhD;

Sandesh Patil, MBBS, DGO;

Neetal Nevrekar, MD;

Renu Bharadwaj, MD;

Vandana Kulkarni, MSc.

## **THAILAND**

### **Chiang Mai**

Fuenglada Tongprasert, MD;

Tavitiya Sudjaritruk, MD, PhD;

Chintana Khamrong, MSc;

Prapaporn Janjing, BNs, RN, MS.

## **HAITI**

### **Les Centres GHESKIO**

Marie Flore Pierre, MD;

Maria Linda Aristhomene, RN;

Dominique Lespinasse, MD;

Emelyne Dumont.

## **USA**

### **Frontier Sciences**

Rebecca LeBlanc, BSc.

### **IMPAACT Laboratory Center**

Amy James Loftis, BSc.

### **IMPAACT Statistical and Data Analysis Center**

Soyeon Kim, ScD;

David Shapiro, PhD;

Camlin Tierney, PhD.

## **JHU**

Vivian Rexroad, Pharm.D.

## **NIH/NIAID**

Renee Browning, RN, MSN.



## References

1. Metropolitan Atlanta Congenital Defects Program (MACDP) Available at <https://www.cdc.gov/ncbddd/birthdefects/macdp.html>. Accessed July 10, 2018.
2. Swindells S, Ramchandani R, Gupta A, et al. One month of rifapentine/isoniazid to prevent tuberculosis in people with HIV: BRIEF-TB/A5279. *In press NEJM March 14, 2019*. 2018.
3. Menzies D, Adjobimey M, Ruslami R, et al. Four Months of Rifampin or Nine Months of Isoniazid for Latent Tuberculosis in Adults. *N Engl J Med* 2018;379:440-53.
4. Danel C, Moh R, Gabillard D, et al. A Trial of Early Antiretrovirals and Isoniazid Preventive Therapy in Africa. *New Engl J Med* 2015;373:808-22.
5. Rangaka MX, Wilkinson RJ, Boulle A, et al. Isoniazid plus antiretroviral therapy to prevent tuberculosis: a randomised double-blind, placebo-controlled trial. *Lancet* 2014;384:682-90.
6. Sterling TR, Villarino ME, Borisov AS, et al. Three months of rifapentine and isoniazid for latent tuberculosis infection. *N Engl J Med* 2011;365:2155-66.
7. Sterling TR, Scott NA, Miro JM, et al. Three months of weekly rifapentine and isoniazid for treatment of Mycobacterium tuberculosis infection in HIV-coinfected persons. *AIDS* 2016;30:1607-15.
8. Martinson NA, Barnes GL, Moulton LH, et al. New regimens to prevent tuberculosis in adults with HIV infection. *N Engl J Med* 2011;365:11-20.
9. Samandari T, Agizew TB, Nyirenda S, et al. 6-month versus 36-month isoniazid preventive treatment for tuberculosis in adults with HIV infection in Botswana: a randomised, double-blind, placebo-controlled trial. *Lancet* 2011;377:1588-98.
